# Supplementary material
Source: PubMed Central journal article supplement (PMC4028323)
Supplement: auto-10-45-s01.pdf [file auto-10-45-s01.pdf]

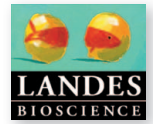

## **Supplemental Material to:**

**Heesun Cheong, Junmin Wu, Linda K Gonzales,  
Susan H Guttentag, Craig B Thompson,  
and Tullia Lindsten**

**Analysis of a lung defect in autophagy-deficient mouse  
strains**

**Autophagy 2014; 10(1)**

**<http://dx.doi.org/10.4161/auto.26505>**

**[www.landesbioscience.com/journals/autophagy/article/26505](http://www.landesbioscience.com/journals/autophagy/article/26505)**

Control

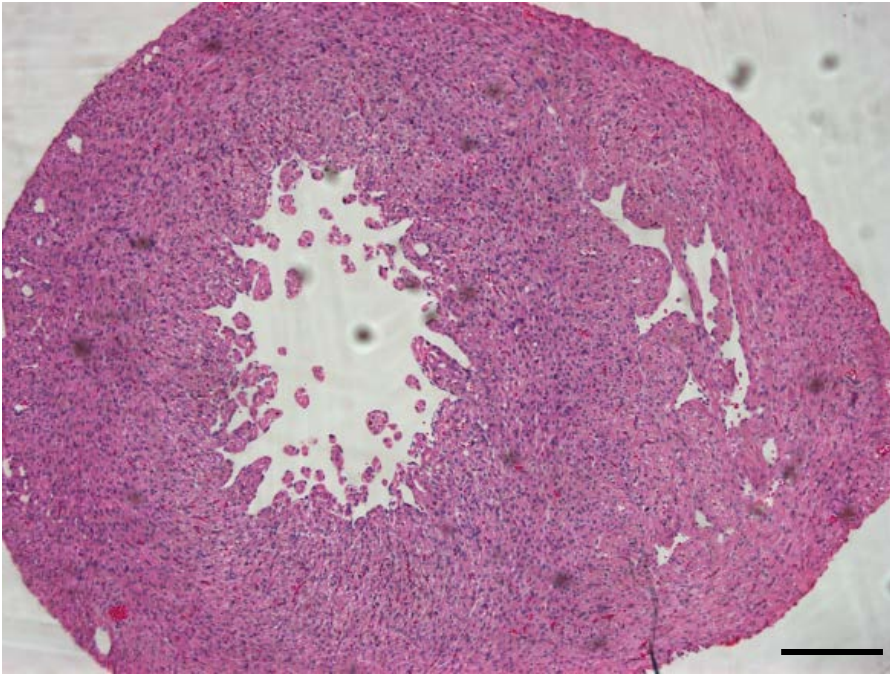

*Ulk1/2* DKO

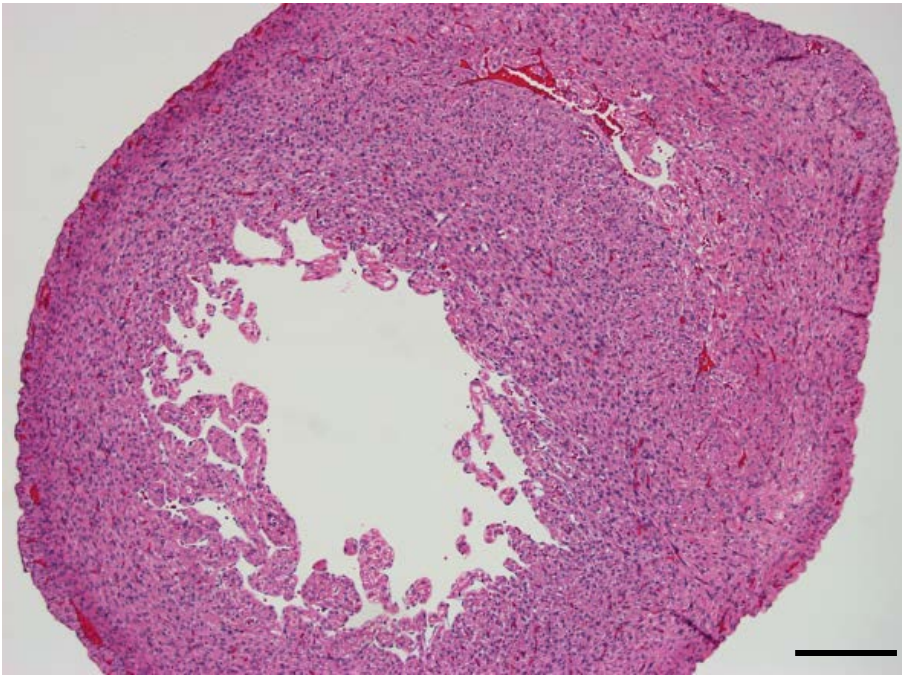

**Figure S1.** Histological section of hearts from *Ulk1/2* control and *Ulk1/2* DKO hearts stained with Hematoxylin-Eosin. Scale bar is 100  $\mu$ M.

A

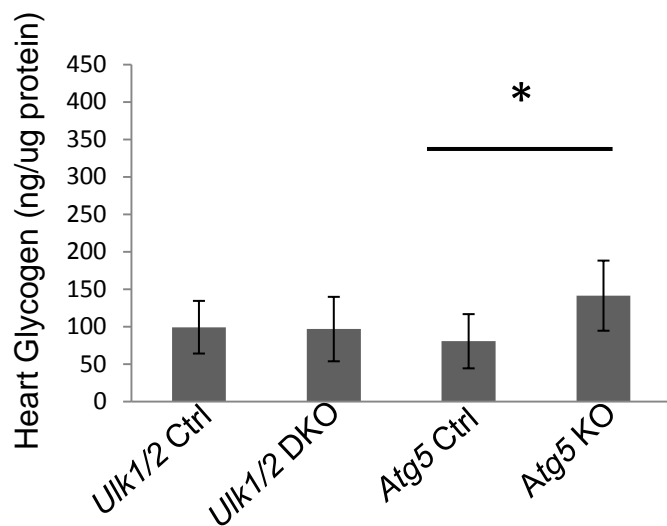

B

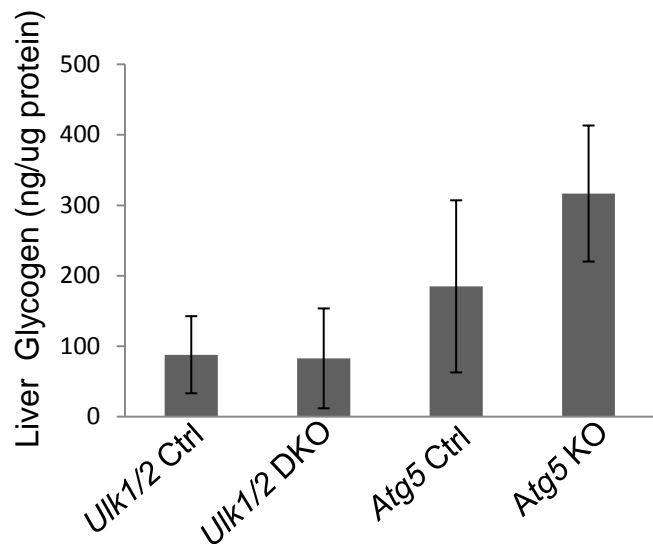

C

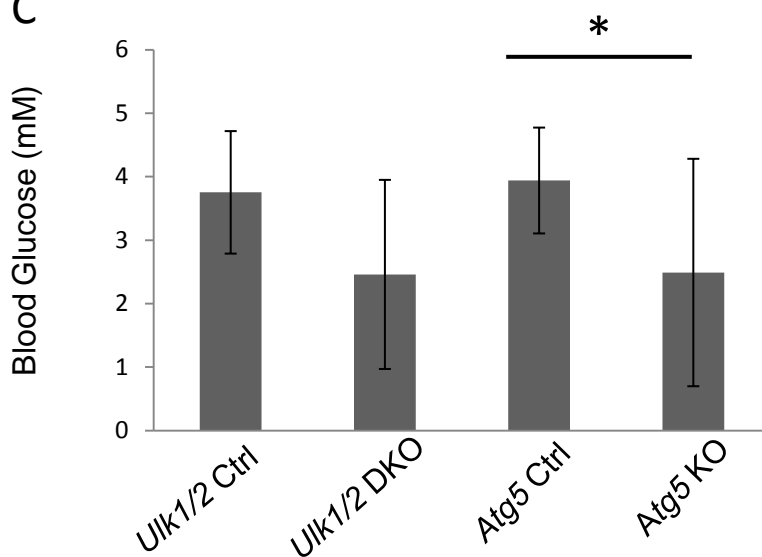

**Figure S2.** Glycogen levels in (A) heart and (B) liver of *Ulk1/2* Ctrl (n=6), *Ulk1/2* DKO (n=6), *Atg5* Ctrl (n=7) and *Atg5* KO (n=5) mice at P1. Organs were homogenized and glycogen content was determined as outlined in Materials and Methods. The graphs show average glycogen levels as ng glycogen/  $\mu$ g protein  $\pm$  SD. (C) Blood glucose, shown as averages  $\pm$  SD, measured in plasma isolated from *Ulk1/2* Ctrl (n=6), *Ulk1/2* DKO (n=5), *Atg5* Ctrl (n=14) and *Atg5* KO (n=6) mice at P1 using the YSI metabolite analyzer. \* indicates p-value  $<0.05$  determined by Student's 2-tailed t-test.

Control

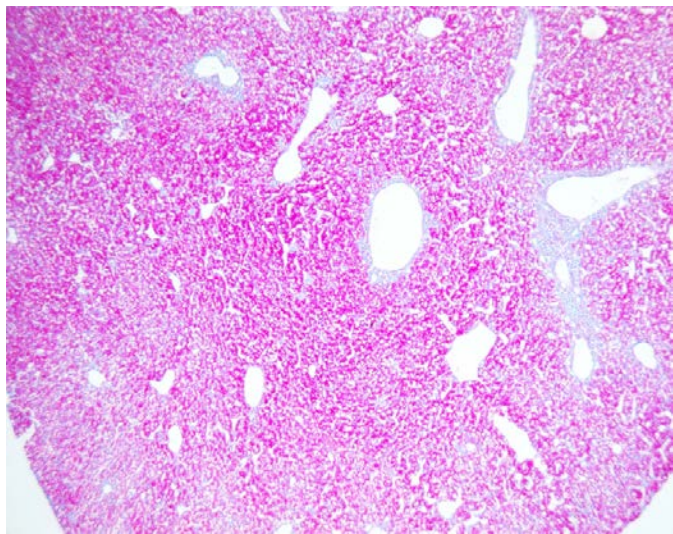

Control

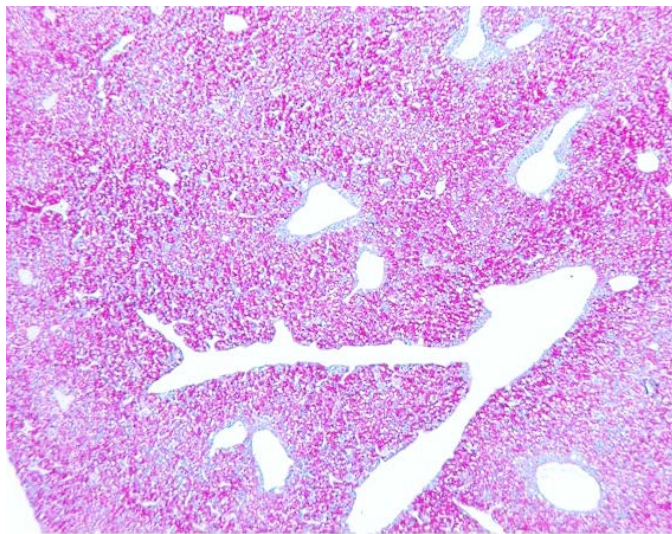

*Ulk1/2* DKO

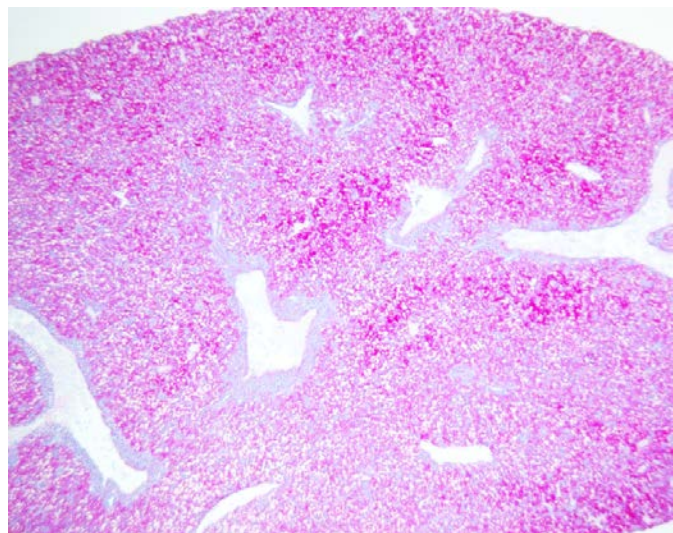

*Ulk1/2* DKO

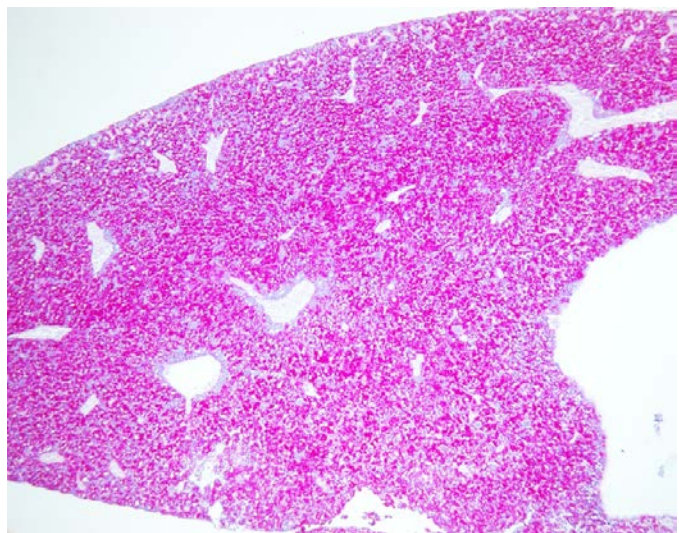

*Atg5* KO

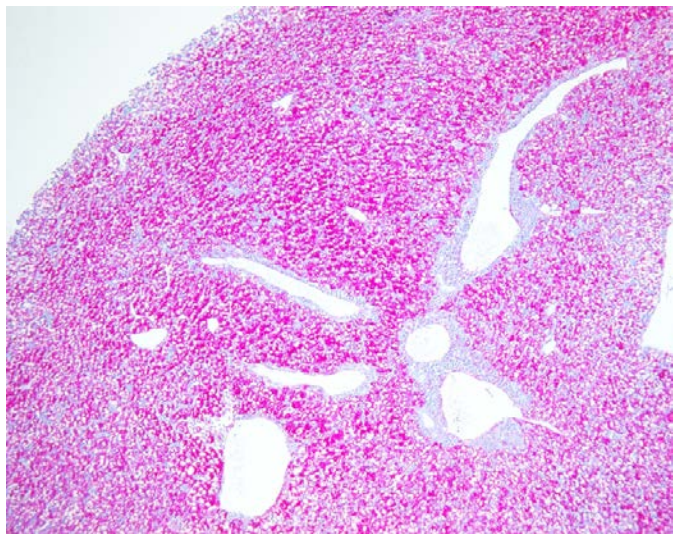

*Atg5* KO

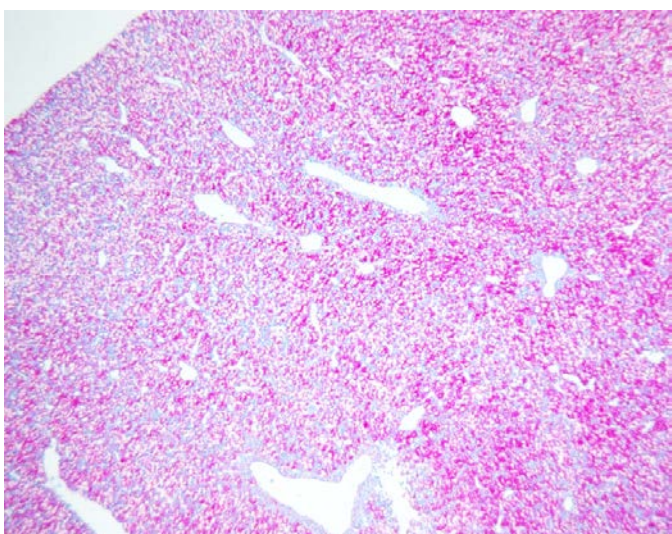

**Figure S3.** Histological sections of livers from Control, *Ulk1/2* DKO and *Atg5* KO mice at P1, stained with PAS to visualize glycogen.

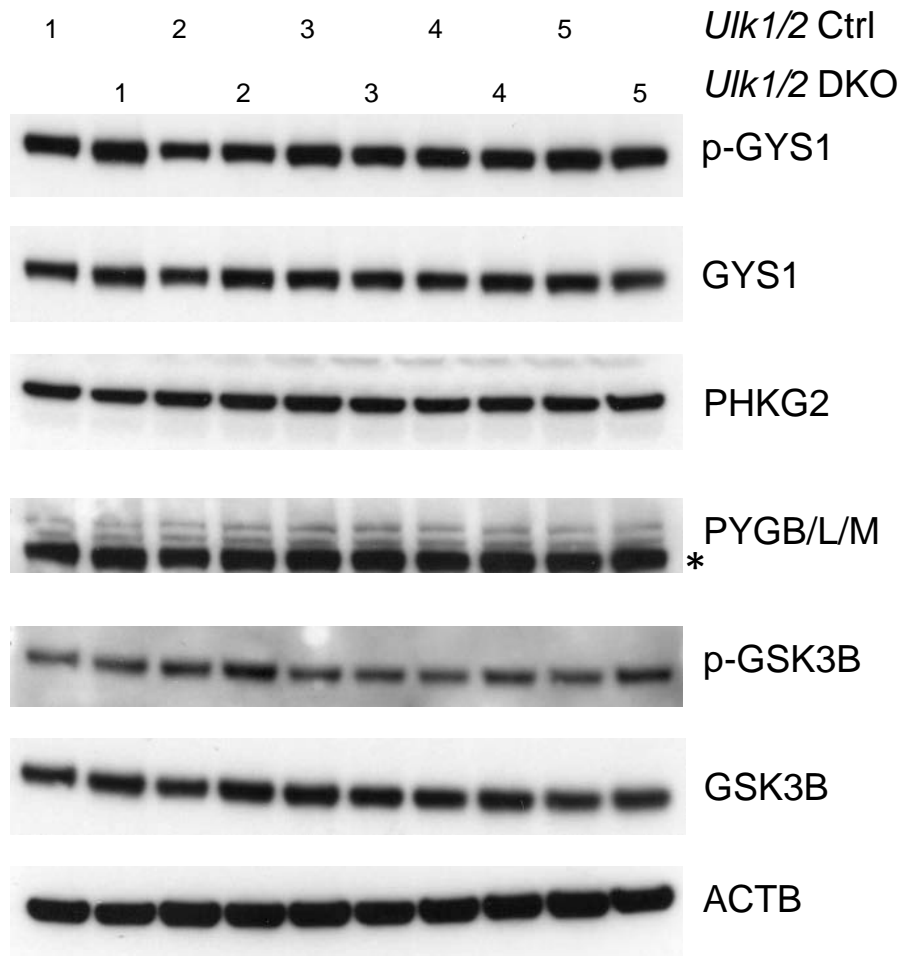

**Figure S4.** Enzymes involved in glycogen metabolism analyzed by western blot. Lysates of frozen lung tissue from *Ulk1/2 Ctrl* (n=5) and *Ulk1/2 DKO* (n=5) mice at P1 were prepared from litter mate controls indicated by number 1 to 5. Expression of p-GYS1 (phospho-glycogen synthase), GYS1 (glycogen synthase), PHKG2 [phosphorylase kinase, gamma 2 (testis)], PYGB/L/M (phosphorylase, glycogen; brain/liver/muscle), p-GSK3B (phospho-glycogen synthase kinase 3 beta), GSK3B (glycogen synthase kinase 3 beta) and ACTB (beta actin) was examined by western blot. \* indicates nonspecific band.
